# Supplementary material for: Discoidin domain receptor 1-deletion ameliorates fibrosis and promotes adipose tissue beiging, brown fat activity, and increased metabolic rate in a mouse model of cardiometabolic disease
Source: PubMed Central journal article supplement (PMC7242876; doi:10.1016/j.molmet.2020.101006), 2020-04-28
Supplement: mmc1.pdf [file mmc1.pdf]

**Table S1. Primers sequences for genes assessed by qRT-PCR.**

| <b>Gene</b>   | <b>Forward primer (5' to 3')</b> | <b>Reverse primer (5' to 3')</b> |
|---------------|----------------------------------|----------------------------------|
| <i>ucp1</i>   | CTGCCTCTCTCGGAAACAAG             | TGCATTCTGACCTTCACGAC             |
| <i>col1a1</i> | ACGCCATCAAGGTCTACTGC             | GTTCGGGCTGATGTACCAGT             |
| <i>col3a1</i> | ACCAAAGGTGATGCTGGAC              | TCCAGTTAGCCCTGCAATTC             |
| <i>col8a1</i> | GGGATTTTGGAGGGTTCTTC             | TAGTCCTGCAGCTCAAAGCA             |
| <i>srebp2</i> | AGCTGGCAAATCAGAAAAACAAG          | GATTAAAGTCTTCAATCTTCAAGTCCAC     |
| <i>cd36</i>   | GTATTCTCATGCCAGTTGGAGAC          | TTTAACCCAGTTTTTCAAAGCAA          |
| <i>abcg1</i>  | AAGAAGGTGGACAACAACCTTCAC         | CCTTTCAAAGGGTCTTGTATCC           |
| <i>abcg5</i>  | CCATTCTGACTTACGGAGAGTTG          | CAGGGGTAACCACAGTTATTGAA          |
| <i>fas</i>    | GCAGTCTTGAGTAGCTTTGTGCT          | GGGAGCTGTCCAGATTAATACCT          |
| <i>lpl</i>    | TACAGGTGCAACTCTAAGGAAGC          | GTCTTCAGGTACATCTTGCTGCT          |
| <i>18s</i>    | CGAAAGCATTTGCCAAGAAT             | AGTCGGCATCGTTTTATGGTC            |

Primers for *ucp1*, *col1a1*, *col3a1*, *col8a1*, and *18s* were generated using Batch Primer 3 v1.0 (<http://batchprimer3.bioinformatics.ucdavis.edu/cgi-bin/batchprimer3/batchprimer3.cgi>). Primers for *srebp2*, *cd36*, *abcg1*, *abcg5*, *fas*, and *lpl*, were published elsewhere [1].

1. Naples, M., C. Baker, M. Lino, J. Iqbal, M.M. Hussain and K. Adeli, 2012. Ezetimibe ameliorates intestinal chylomicron overproduction and improves glucose tolerance in a diet-induced hamster model of insulin resistance. *Am J Physiol Gastrointest Liver Physiol* 302(9): G1043-52. <https://doi.org/10.1152/ajpgi.00250.2011>.

**Table S2. Fasting blood glucose, triglyceride, total cholesterol, HDL-c and LDL-c in Ddr1<sup>+/+</sup> and Ddr1<sup>-/-</sup> mice fed HFD or control CF for 12 weeks.**

| Parameter                     | Ddr1 <sup>+/+</sup> (n=9) | Ddr1 <sup>-/-</sup> (n=9) | p-value | Sig |
|-------------------------------|---------------------------|---------------------------|---------|-----|
| CF Body weight (g)            | 21.90±2.34                | 18.53±4.28                | 0.0316  | *   |
| HFD Body weight (g)           | 43.10±5.33                | 31.65±6.87                | 0.0008  | *** |
| CF Blood glucose (mg/dL)      | 137.90±25.96              | 121.70±43.34              | 0.3009  | ns  |
| HFD Blood glucose (mg/dL)     | 167.80±24.76              | 152.20±22.09              | 0.1772  | ns  |
| HFD Triglyceride (mg/dL)      | 214.80±23.31              | 189.90±26.43              | 0.4946  | ns  |
| HFD Total Cholesterol (mg/dL) | 1694±106.2                | 1031±104.6                | 0.001   | *** |
| HFD HDL-c (mg/dL)             | 101.70±3.25               | 88.52±7.93                | 0.1149  | ns  |
| HFD LDL-c (mg/dL)             | 374.90±41.02              | 229.80±15.11              | 0.0127  | *   |

CF, 12-week chow-fed; HFD, 12-week high-fat diet fed; HDL-c, high-density lipoprotein cholesterol; LDL-c, low-density lipoprotein cholesterol. Some of these data were previously published [1].

1. Lino, M., M.H. Wan, A.S. Rocca, D. Ngai, N. Shobeiri, G. Hou, et al., 2018. Diabetic Vascular Calcification Mediated by the Collagen Receptor Discoidin Domain Receptor 1 via the Phosphoinositide 3-Kinase/Akt/Runt-Related Transcription Factor 2 Signaling Axis. *Arterioscler Thromb Vasc Biol* 38(8): 1878-1889. <https://doi.org/10.1161/ATVBAHA.118.311238>.

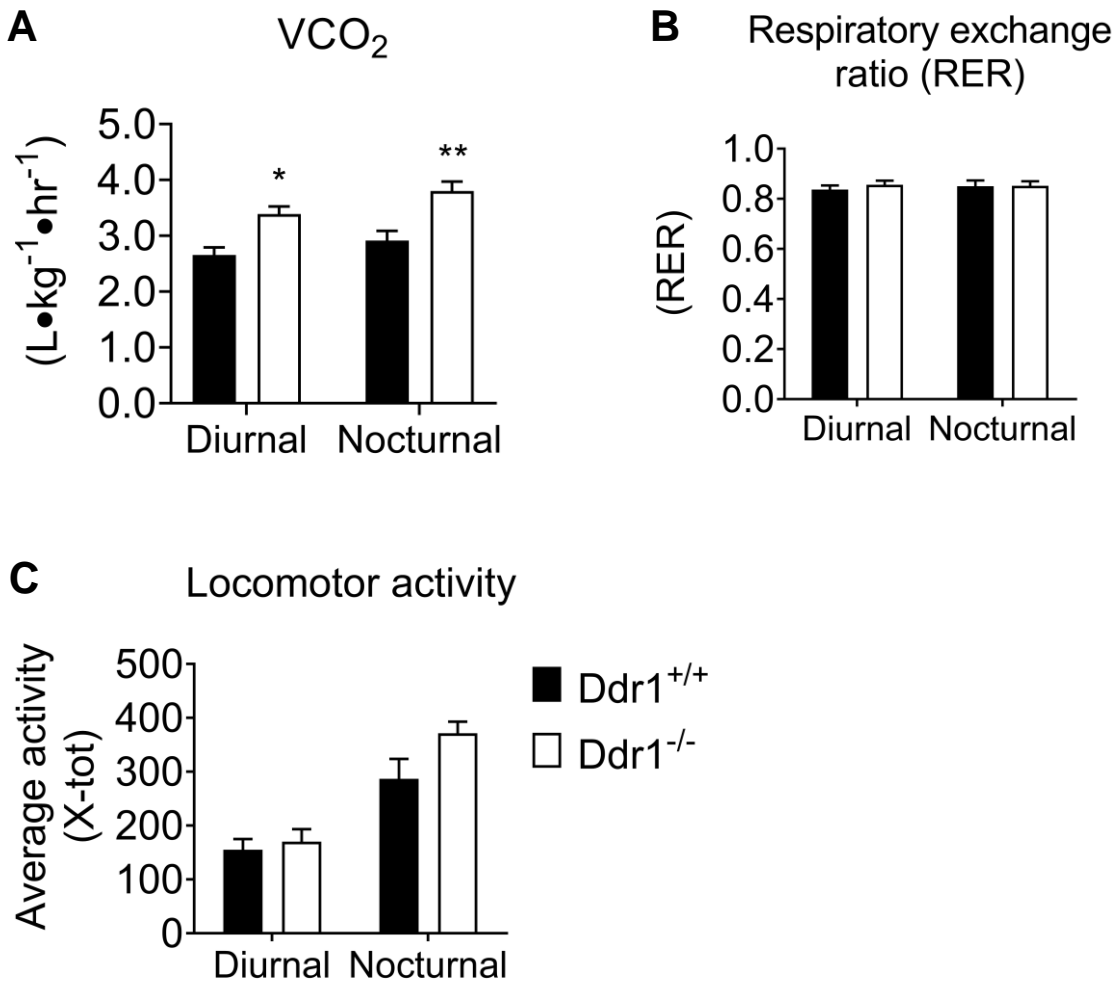

**Figure S1. Ddr1<sup>-/-</sup> mice have increased  $VCO_2$ , no change in RER or locomotor activity.** (A-C)  $VCO_2$  (A), respiratory exchange ratio (RER) (B), and locomotor activity (C), were measured in Ddr1<sup>+/+</sup> and Ddr1<sup>-/-</sup> mice fed HFD for 6 weeks. Statistical analysis was performed by 2-way ANOVA with Bonferroni post-hoc test (A-C). \* $p < 0.05$ , \*\* $p < 0.01$ , compared to Ddr1<sup>+/+</sup>.
